# Supplementary material for: Evolution of fibroblasts in the lung metastatic microenvironment is driven by stage-specific transcriptional plasticity
Source: eLife journal article supplement (doi:10.7554/elife.60745), 2021-06-25
Supplement: supp [file elife-60745-supp-v1.zip]

Archive with 11 entries (11 files):
- elife_poa_e60745_Transparent_Reporting_File.pdf
- elife_poa_e60745_Figure_1_figure_supplement_1.pdf
- elife_poa_e60745_Figure_2_figure_supplement_1.pdf
- elife_poa_e60745_Figure_3_figure_supplement_1.pdf
- elife_poa_e60745_Figure_4_figure_supplement_1.pdf
- elife_poa_e60745_Figure_5_figure_supplement_1.pdf
- elife_poa_e60745_Figure_6_figure_supplement_1.pdf
- elife_poa_e60745_Supplementary_file_1.xlsx
- elife_poa_e60745_Supplementary_file_2.xlsx
- elife_poa_e60745_Supplementary_file_3.xlsx
- elife_poa_e60745_Supplementary_file_4.xlsx
