# Supplementary material for: Evolution of fibroblasts in the lung metastatic microenvironment is driven by stage-specific transcriptional plasticity
Source: eLife journal article supplement (doi:10.7554/elife.60745), 2021-06-25
Supplement: supp [file elife-60745-supp-v1.zip › elife_poa_e60745_Supplementary_file_3.xlsx]

## Sheet: גיליון1
MIF vs NLF	MAF vs NLF	MAF vs MIF
Regulation of HSF1-mediated heat shock response	NF-kappa B signaling pathway - Mus musculus (mouse)	NF-kappa B signaling pathway - Mus musculus (mouse)
HSF1-dependent transactivation	NIK/NF-kappaB signaling	NIK/NF-kappaB signaling
HALLMARK_MYC_TARGETS_V2	TNFR2 non-canonical NF-kB pathway	p75NTR signals via NF-kB
	NF-kB is activated and signals survival	NF-kB is activated and signals survival
	p75NTR signals via NF-kB	HALLMARK_MYC_TARGETS_V1
	HIF-1 signaling pathway - Mus musculus (mouse)	HALLMARK_TNFA_SIGNALING_VIA_NFKB
	HALLMARK_MYC_TARGETS_V1	HALLMARK_IL6_JAK_STAT3_SIGNALING
	HALLMARK_MYC_TARGETS_V2
	HALLMARK_TNFA_SIGNALING_VIA_NFKB
	HALLMARK_IL6_JAK_STAT3_SIGNALING
