# Supplementary figures and images for: Evolution of fibroblasts in the lung metastatic microenvironment is driven by stage-specific transcriptional plasticity
Source: eLife journal article supplement (doi:10.7554/elife.60745), 2021-06-25

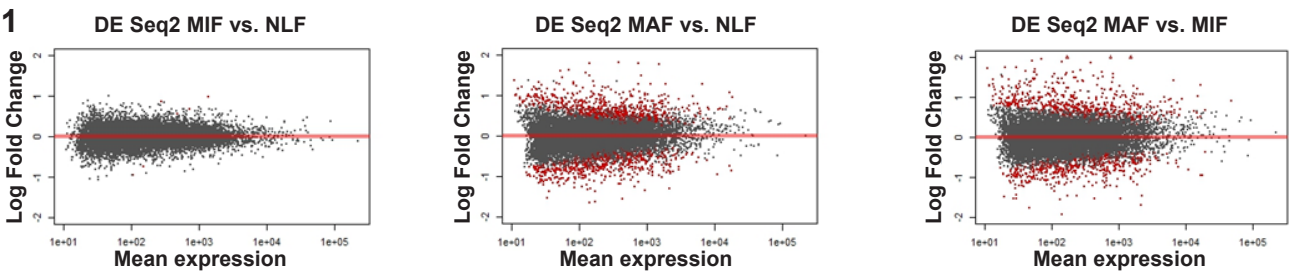

Supplement: supp [file elife-60745-supp-v1.zip › elife_poa_e60745_Figure_1_figure_supplement_1.pdf]

1

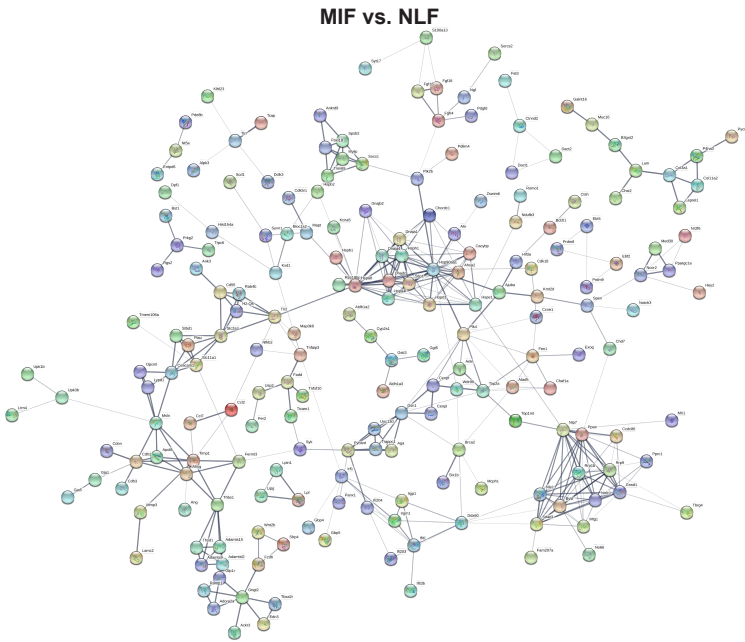

2

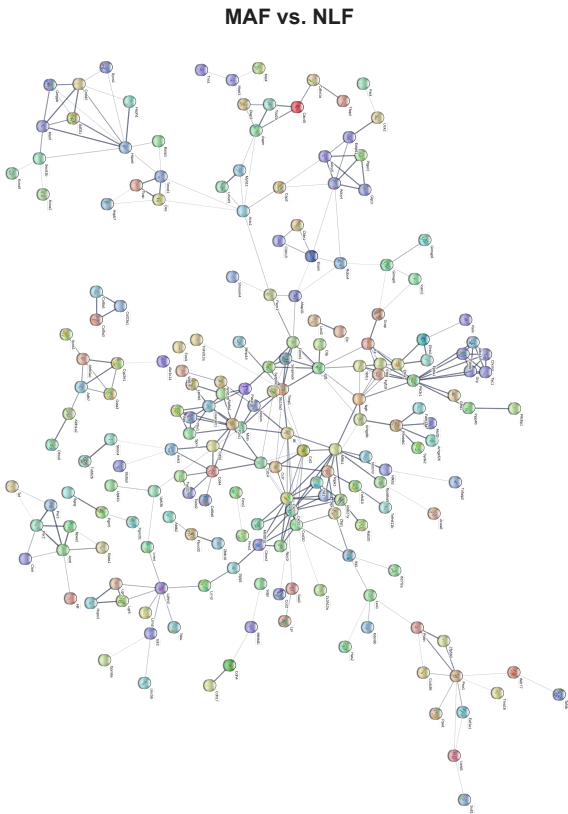

3

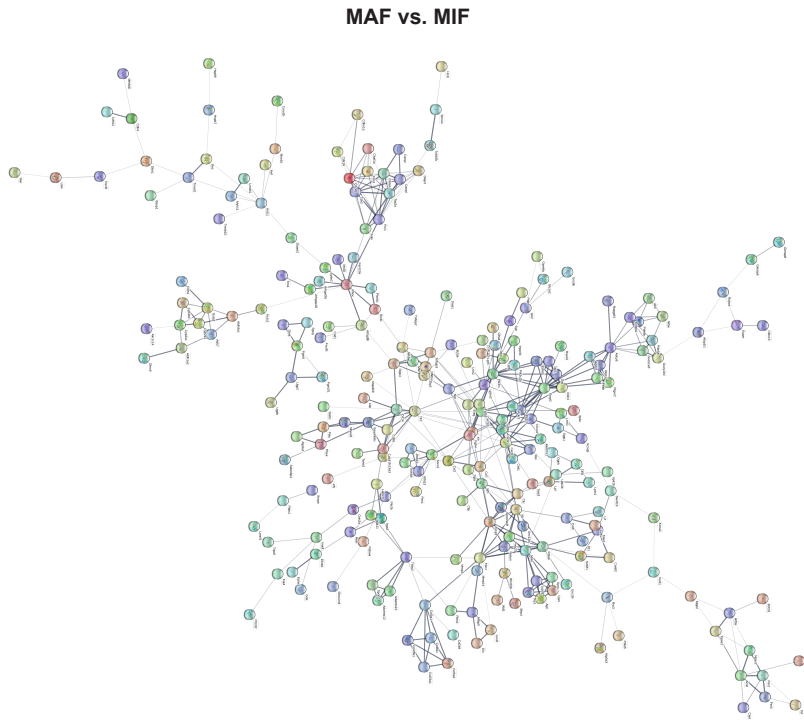

Supplement: supp [file elife-60745-supp-v1.zip › elife_poa_e60745_Figure_2_figure_supplement_1.pdf]

1

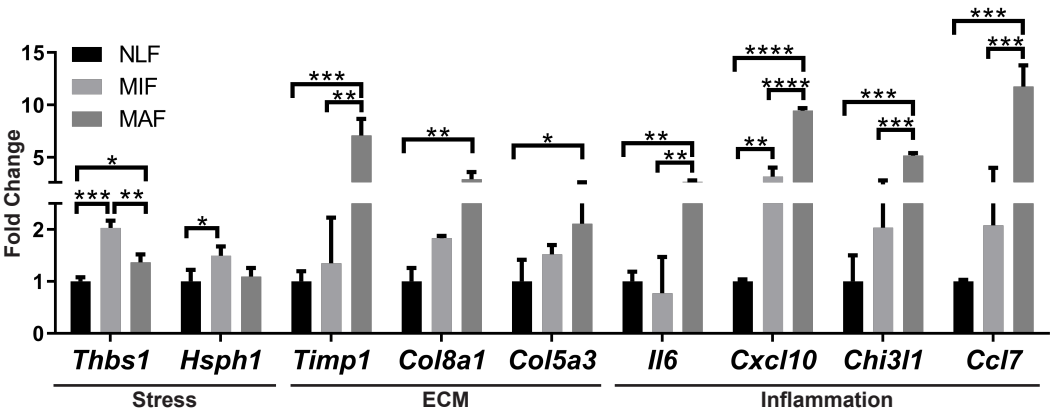

2

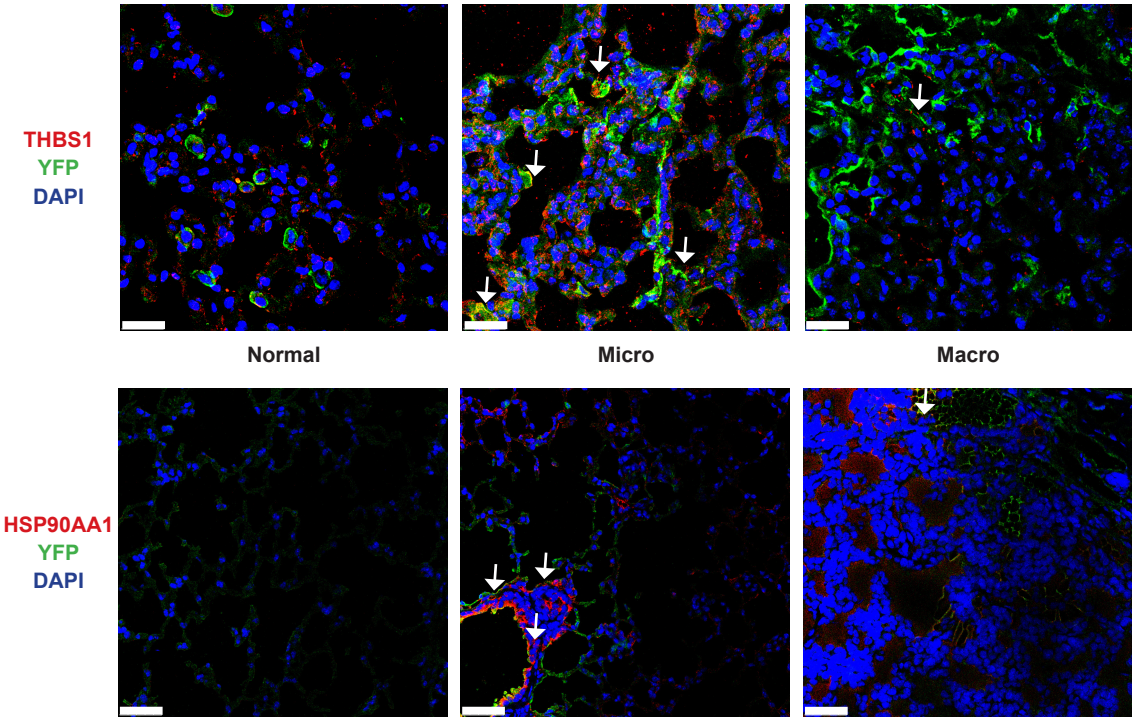

Supplement: supp [file elife-60745-supp-v1.zip › elife_poa_e60745_Figure_3_figure_supplement_1.pdf]

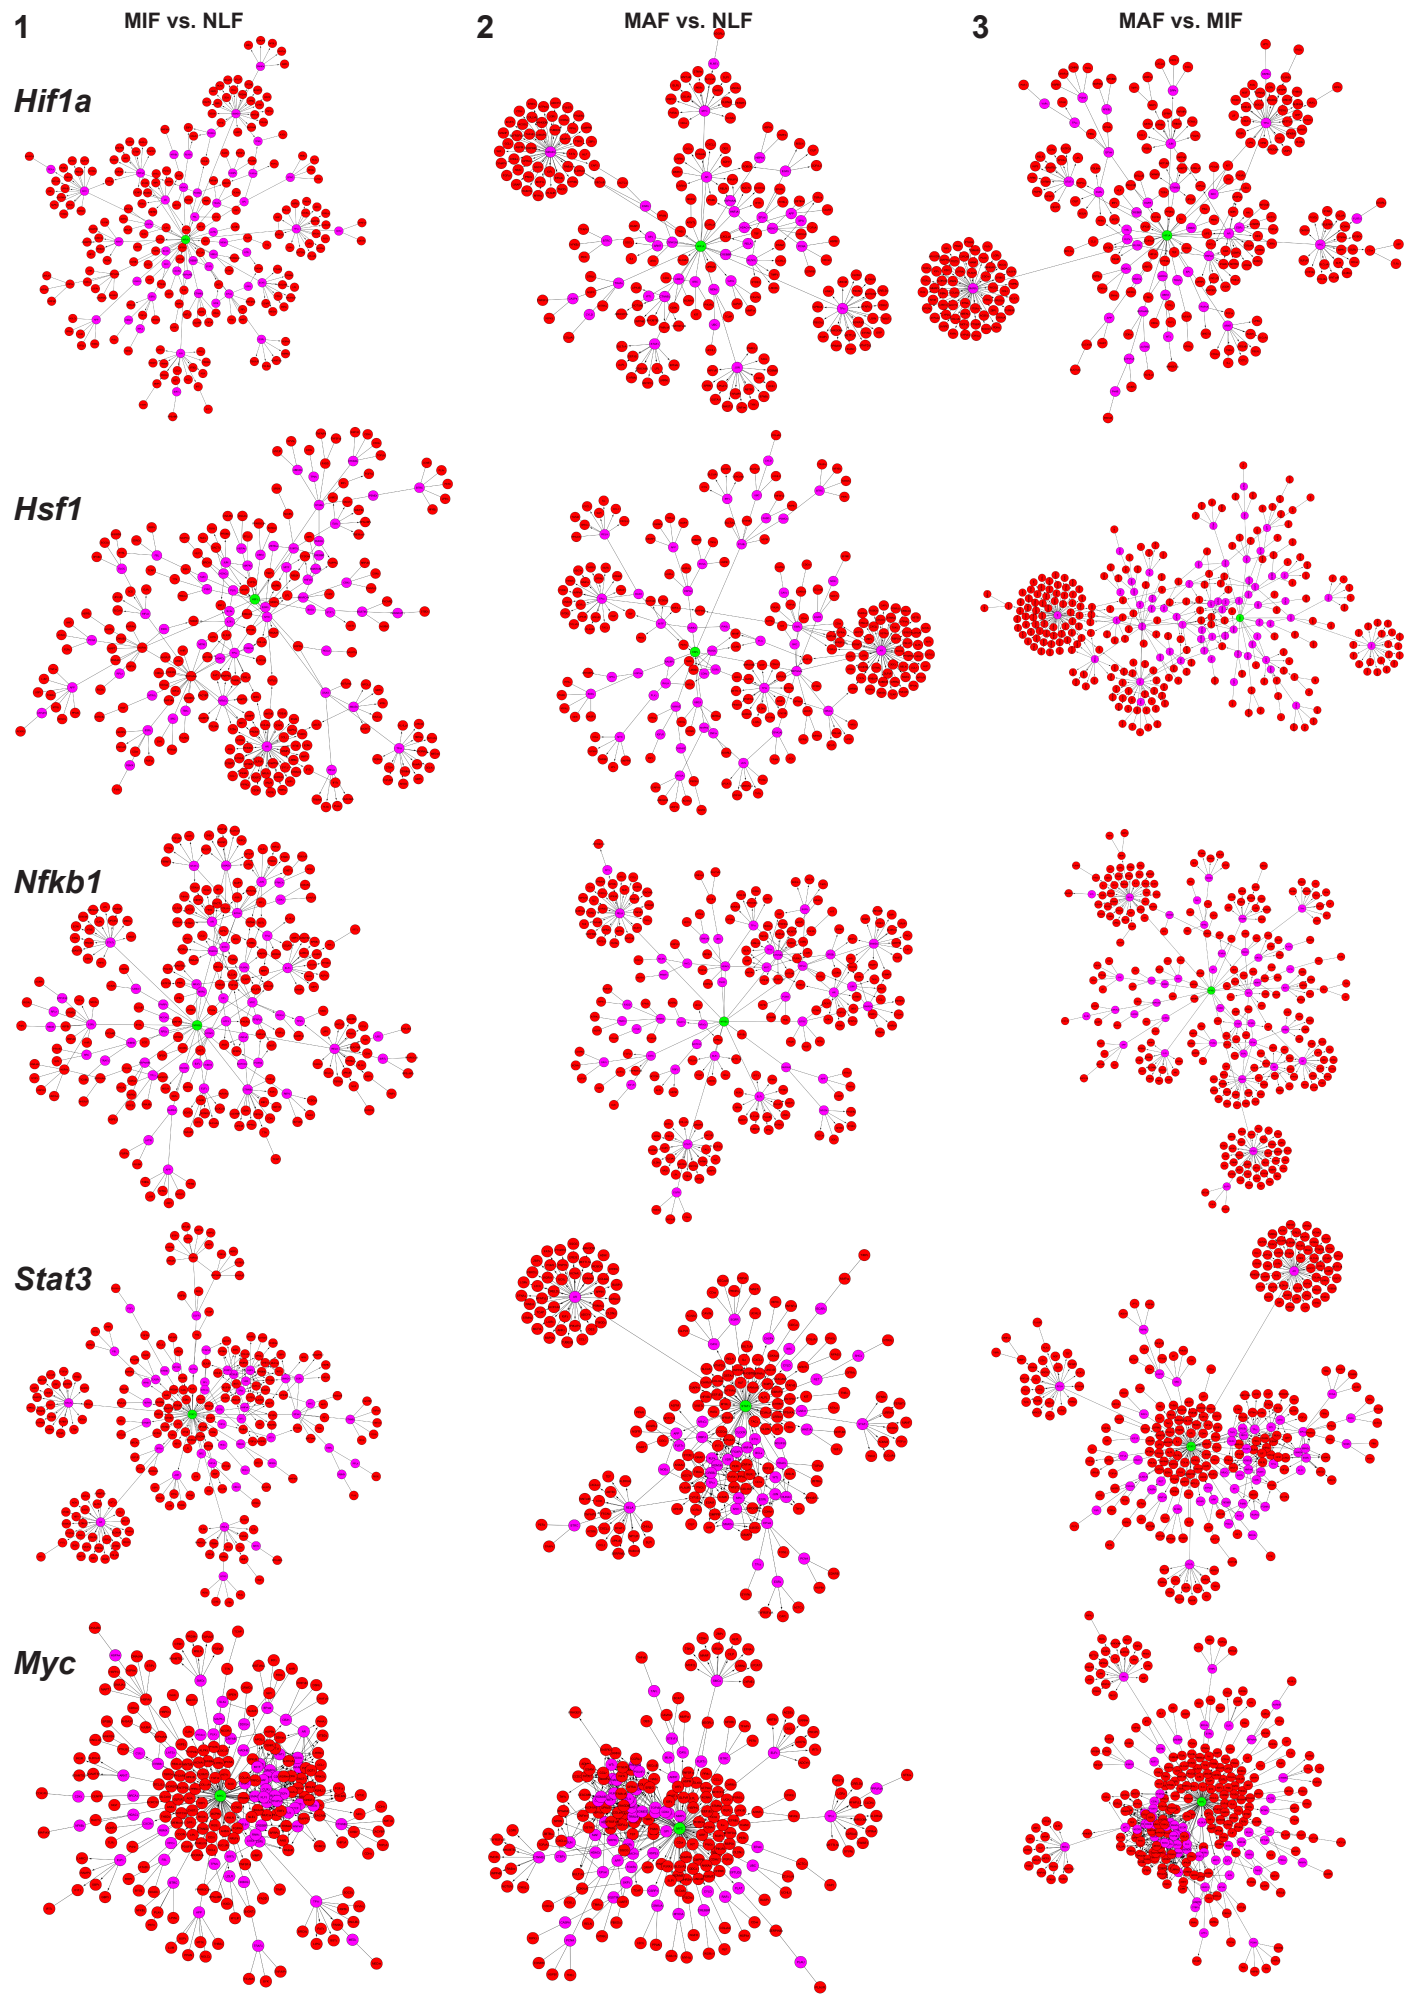

Supplement: supp [file elife-60745-supp-v1.zip › elife_poa_e60745_Figure_4_figure_supplement_1.pdf]

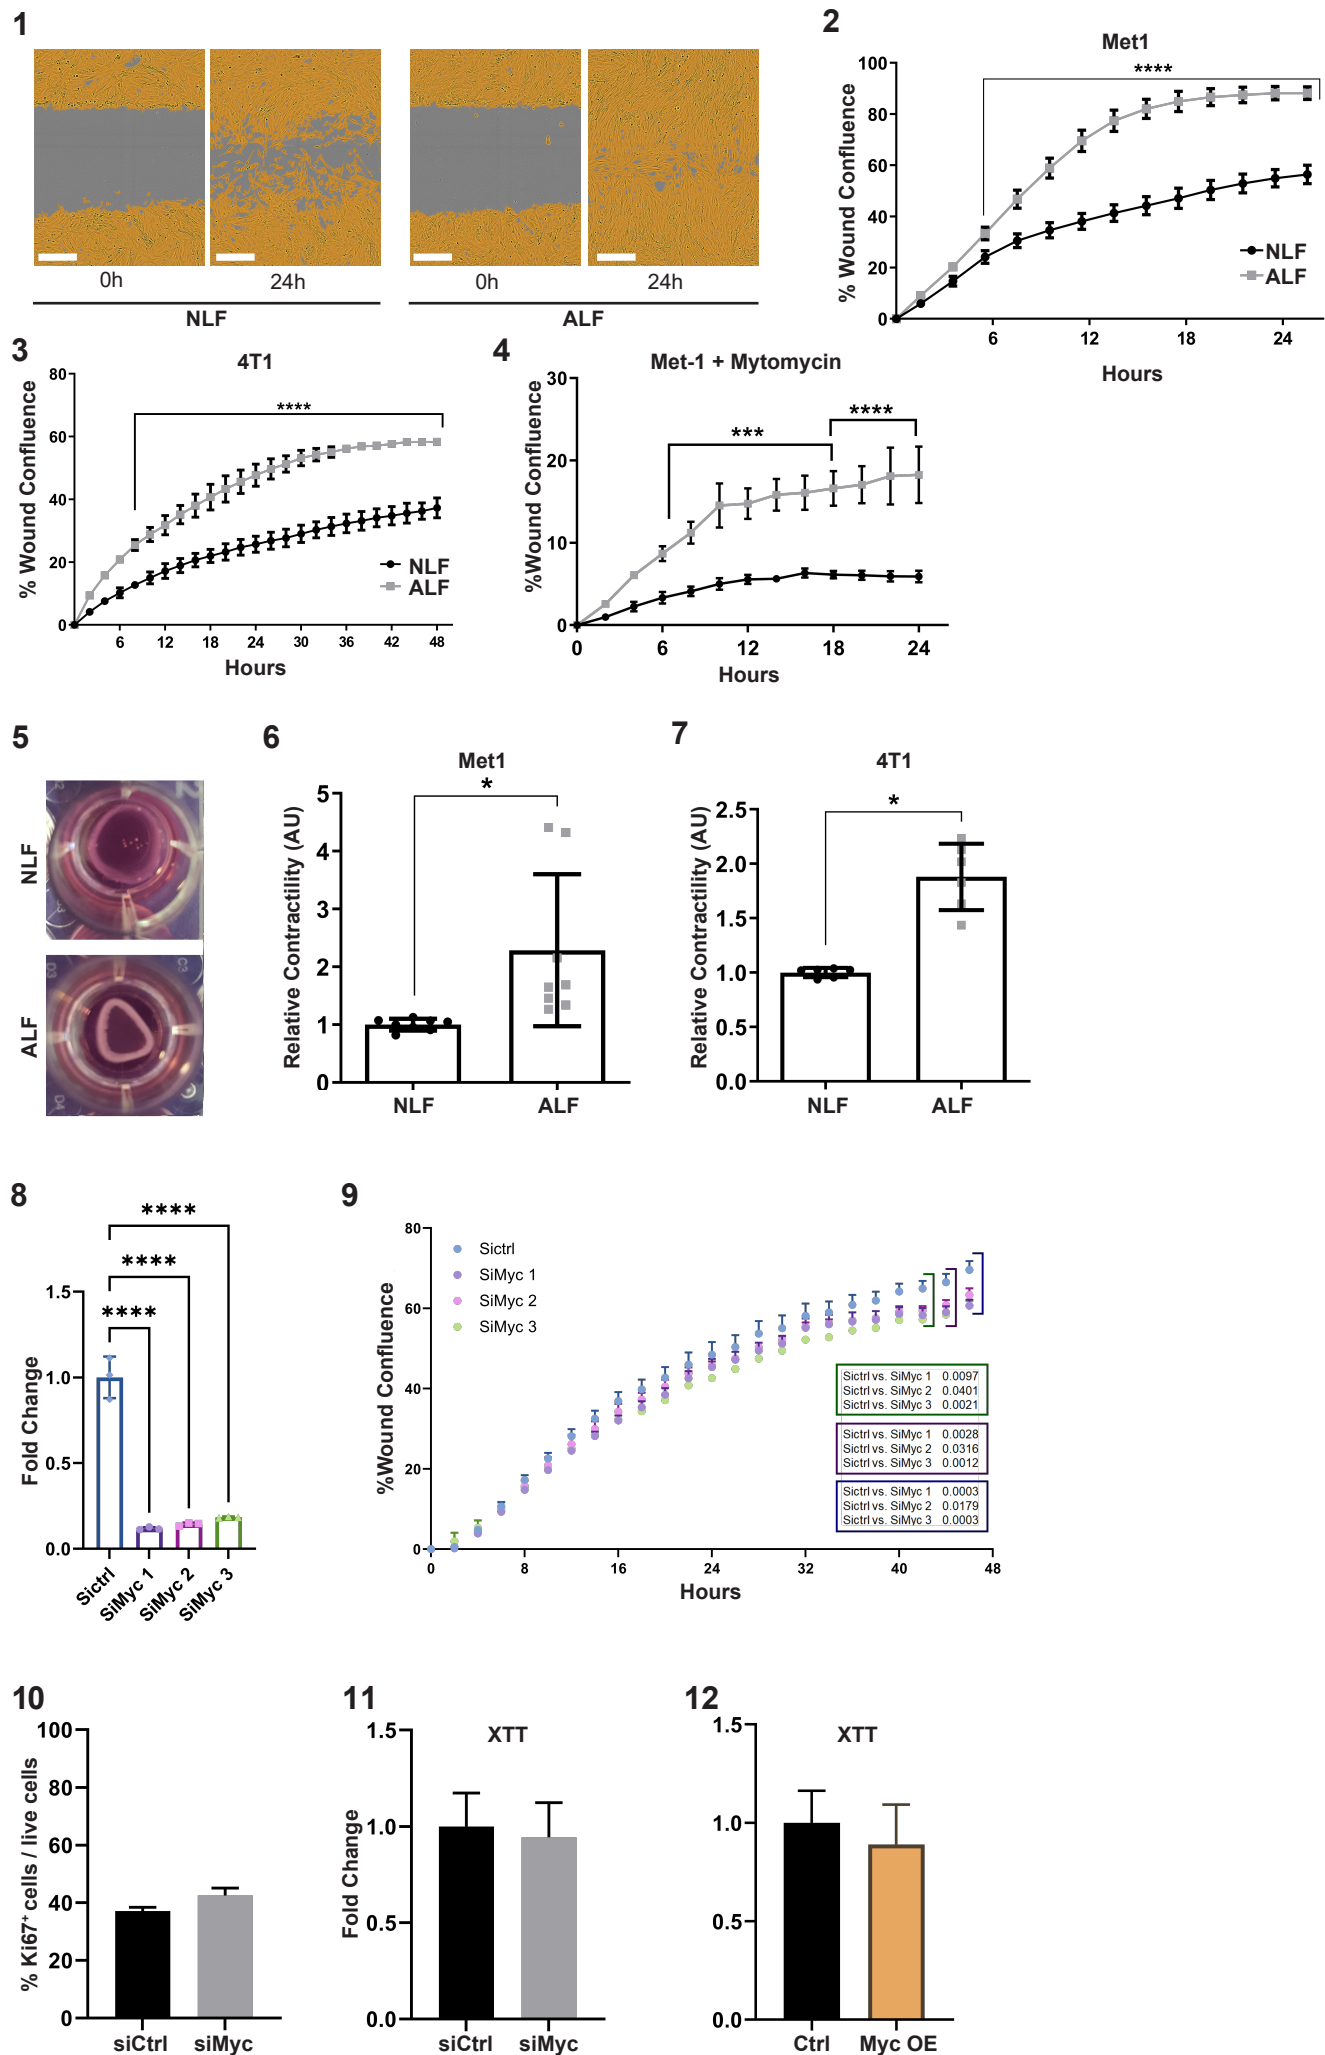

Supplement: supp [file elife-60745-supp-v1.zip › elife_poa_e60745_Figure_5_figure_supplement_1.pdf]

1

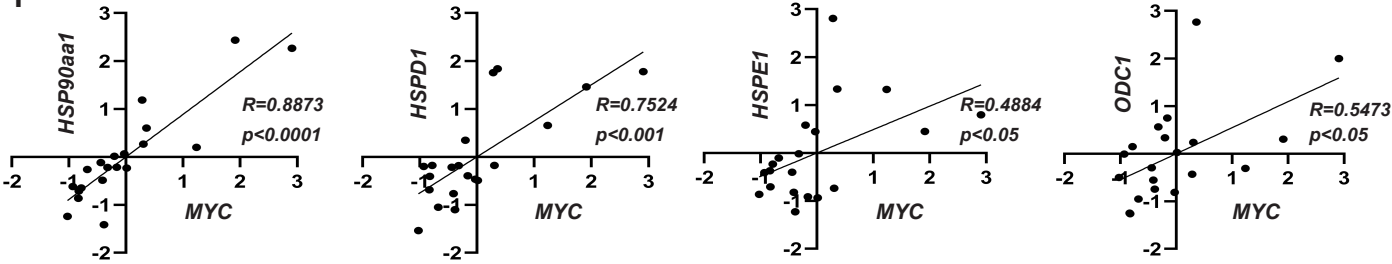

Supplement: supp [file elife-60745-supp-v1.zip › elife_poa_e60745_Figure_6_figure_supplement_1.pdf]
